# Supplementary material for: Splenic Blood Flow Increases after Hypothermic Stimulus (Cold Pressor Test): A Perfusion Magnetic Resonance Study
Source: Hindawi journal article supplement (doi:10.1155/2019/8437927), 2019-05-23
Supplement: f1 [file 8437927.f1.pdf]

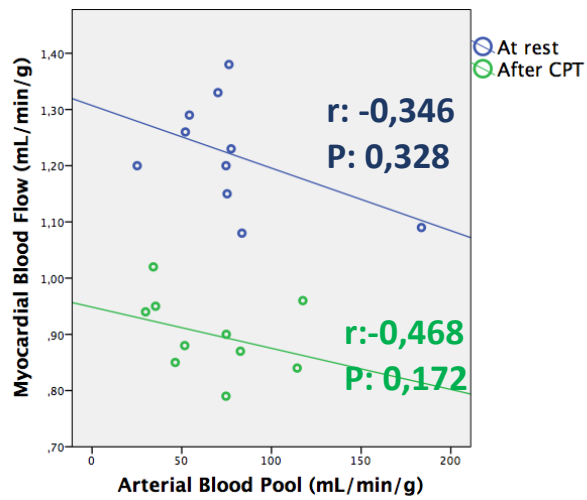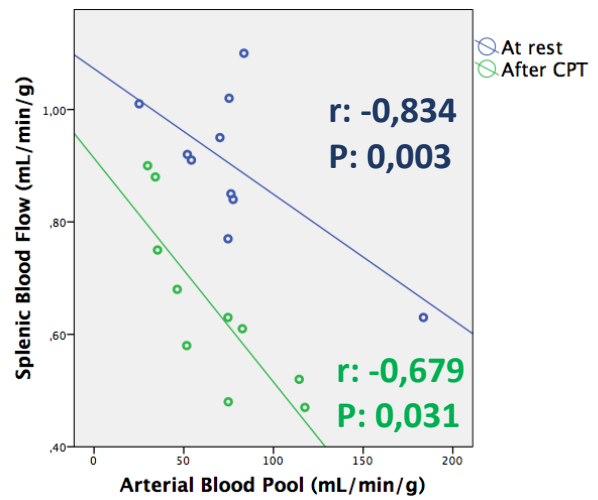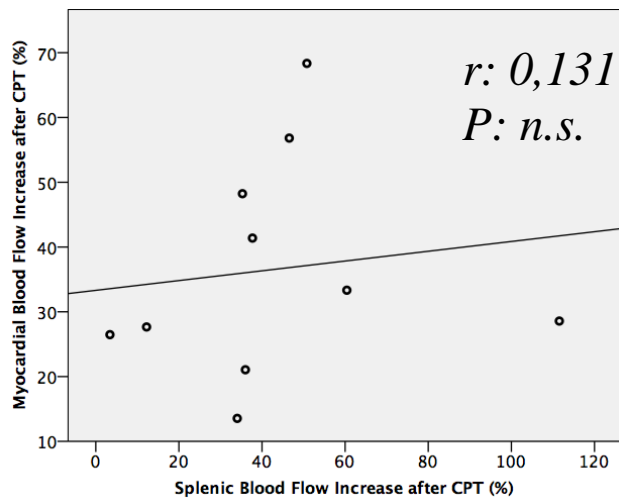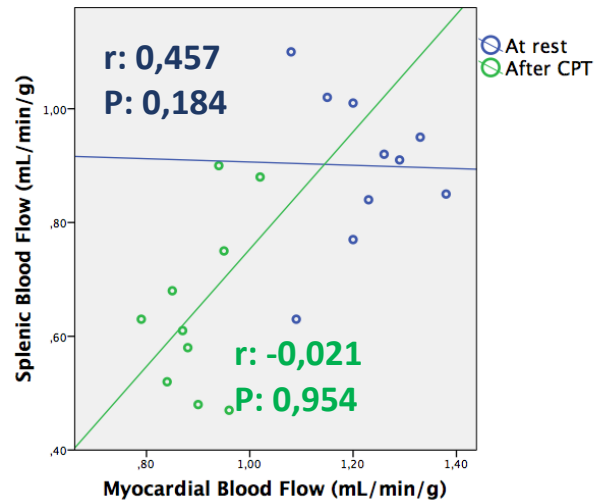

Supplementary Figure: Bivariate correlation between MBF, ABP, and SBF at rest and after CPT and MBF vs. SBF increase (%) after CPT using Pearson's or Spearman's coefficient.
